# Supplementary material for: Mesoscale interplay between phonons and crystal electric field excitations in quantum spin liquid candidate CsYbSe2
Source: Royal Society of Chemistry journal article supplement (doi:10.1039/d1tc05934c), 2022-01-01
Supplement: d1tc05934c1.pdf [file d1tc05934c1.pdf]

# Supplemental Information for Mesoscale Interplay Between Phonons and Crystal Electric Field Excitations in Quantum Spin Liquid Candidate $\text{CsYbSe}_2$

## 1. TEMPERATURE DEPENDENCE FOR HIGHER ENERGY BAND

Figure S1 shows temperature-dependent unpolarized Raman spectra taken in a higher energy band from  $T = 3.3$  K to  $T = 270$  K. The spectra were taken with Semrock dichroic and longpass filters instead of a set of volume Bragg gratings.

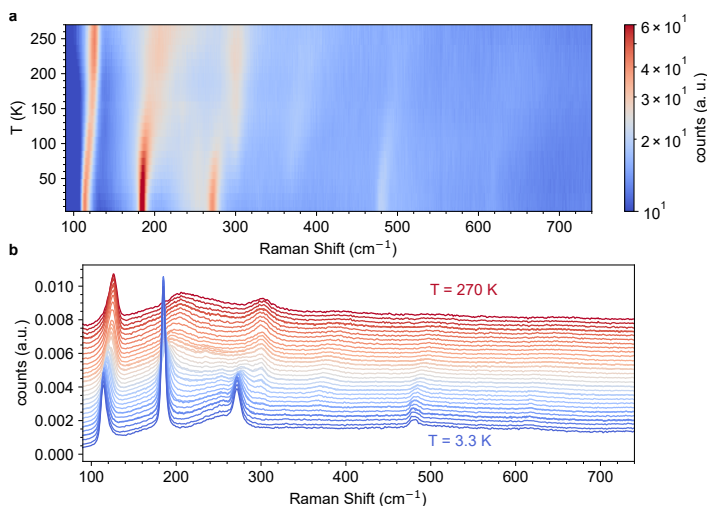

**Fig. S1.** Raman spectra in a higher energy band as a function of temperature from  $T = 3.3$  K to  $T = 270$  K.

## 2. RAMAN GROUP THEORY ANALYSIS FOR CSYBSE<sub>2</sub>

CsYbSe<sub>2</sub> belongs to the space group  $P6_3/mmc$  (No. 194) with the point group  $D_{6h}$ , and its Raman active phonon modes consist of non-degenerate  $A_{1g}$  symmetry modes, doubly degenerate  $E_{2g}$  symmetry modes ( $E_{2g} - x$  and  $E_{2g} - y$ ), and doubly degenerate  $E_{1g}$  symmetry modes ( $E_{1g} - x$  and  $E_{1g} - y$ ). Their Raman tensors  $\tilde{R}$  assume the following forms:

$$\begin{aligned}\tilde{R}(A_{1g}) &= \begin{pmatrix} a & \cdot & \cdot \\ \cdot & a & \cdot \\ \cdot & \cdot & b \end{pmatrix} \\ \tilde{R}(E_{2g} - x) &= \begin{pmatrix} c & \cdot & \cdot \\ \cdot & -c & \cdot \\ \cdot & \cdot & \cdot \end{pmatrix}; \tilde{R}(E_{2g} - y) = \begin{pmatrix} \cdot & c & \cdot \\ c & \cdot & \cdot \\ \cdot & \cdot & \cdot \end{pmatrix} \\ \tilde{R}(E_{1g} - x) &= \begin{pmatrix} \cdot & \cdot & \cdot \\ \cdot & \cdot & d \\ \cdot & d & \cdot \end{pmatrix}; \tilde{R}(E_{1g} - y) = \begin{pmatrix} \cdot & \cdot & d \\ \cdot & \cdot & \cdot \\ d & \cdot & \cdot \end{pmatrix}\end{aligned}\quad (S1)$$

In the experimental back-scattering laser geometry (light  $Z$  in and  $Z$  out) with linear polarization, the electric polarization vectors of the scattered and incident light  $\mathbf{e}_s$  and  $\mathbf{e}_i$  are in-plane (i.e., the  $X$ - $Y$  plane), and they are given by  $\mathbf{e}_s = (\cos\gamma, \sin\gamma, 0)$  and  $\mathbf{e}_i = (\cos\theta, \sin\theta, 0)$ . With Raman intensity  $I \propto |\mathbf{e}_s \cdot \tilde{R} \cdot \mathbf{e}_i^T|^2$ , we have:

$$I \propto \left| \begin{pmatrix} \cos\gamma & \sin\gamma & 0 \end{pmatrix} \cdot \tilde{R} \cdot \begin{pmatrix} \cos\theta \\ \sin\theta \\ 0 \end{pmatrix} \right|^2 \quad (S2)$$

It is obvious that  $E_{1g}$  phonon modes have zero Raman intensity in the back-scattering geometry, and thus cannot be observed experimentally. For  $A_{1g}$  and  $E_{2g}$  modes, by substituting the Raman tensors  $\tilde{R}$  from Eq. S1 into Eq. S2, we can obtain

$$\begin{aligned}I(A_{1g}) &\propto \left| \begin{pmatrix} \cos\gamma & \sin\gamma & 0 \end{pmatrix} \cdot \begin{pmatrix} a & \cdot & \cdot \\ \cdot & a & \cdot \\ \cdot & \cdot & b \end{pmatrix} \cdot \begin{pmatrix} \cos\theta \\ \sin\theta \\ 0 \end{pmatrix} \right|^2 \\ &\propto |a\cos\gamma\cos\theta + a\sin\gamma\sin\theta|^2 \\ &\propto |a|^2\cos^2(\gamma - \theta)\end{aligned}\quad (S3)$$

$$\begin{aligned}I(E_{2g} - x) &\propto \left| \begin{pmatrix} \cos\gamma & \sin\gamma & 0 \end{pmatrix} \cdot \begin{pmatrix} c & \cdot & \cdot \\ \cdot & -c & \cdot \\ \cdot & \cdot & \cdot \end{pmatrix} \cdot \begin{pmatrix} \cos\theta \\ \sin\theta \\ 0 \end{pmatrix} \right|^2 \\ &\propto \left| \begin{pmatrix} c\cos\gamma & -c\sin\gamma & 0 \end{pmatrix} \cdot \begin{pmatrix} \cos\theta \\ \sin\theta \\ 0 \end{pmatrix} \right|^2 \\ &\propto |c\cos\gamma\cos\theta - c\sin\gamma\sin\theta|^2 \\ &\propto |c|^2\cos^2(\gamma + \theta)\end{aligned}\quad (S4)$$

$$\begin{aligned}
I(E_{2g} - y) &\propto \left| \begin{pmatrix} \cos\gamma & \sin\gamma & 0 \end{pmatrix} \cdot \begin{pmatrix} \cdot & c & \cdot \\ c & \cdot & \cdot \\ \cdot & \cdot & \cdot \end{pmatrix} \cdot \begin{pmatrix} \cos\theta \\ \sin\theta \\ 0 \end{pmatrix} \right|^2 \\
&\propto \left| \begin{pmatrix} c\sin\gamma & c\cos\gamma & 0 \end{pmatrix} \cdot \begin{pmatrix} \cos\theta \\ \sin\theta \\ 0 \end{pmatrix} \right|^2 \\
&\propto |c\sin\gamma\cos\theta + c\cos\gamma\sin\theta|^2 \\
&\propto |c|^2 \sin^2(\gamma + \theta)
\end{aligned} \tag{S5}$$

Consequently, the Raman intensity of a doubly degenerate  $E_{2g}$  mode is

$$I(E_{2g}) = I(E_{2g} - x) + I(E_{2g} - y) = |c|^2 \cos^2(\gamma + \theta) + |c|^2 \sin^2(\gamma + \theta) = |c|^2 \tag{S6}$$

Eq. S6 indicates that the polarization profile of an  $E_{2g}$  phonon mode is a circle under any linear polarization configuration. For an  $A_{1g}$  phonon mode, under the experimental parallel polarization configuration (i.e.,  $XX$ ,  $\gamma = \theta$ ), its intensity  $I(A_{1g}) \propto |a|^2$  according to Eq. S3 and hence the polarization profile is also a circle; however, under the experimental cross polarization configuration (i.e.,  $XY$ ,  $\gamma = \theta + 90^\circ$ ), its intensity  $I(A_{1g}) = 0$ . These results are in agreement with the experimental data. Interestingly, the polarization profiles of CEFs Raman modes are very similar to the polarization profiles of  $E_{2g}$  phonon modes, suggesting that CEFs modes share similar forms of Raman tensors to  $E_{2g}$  phonon modes.

### 3. POLARIZATION AND ANGULAR DEPENDENCE

Figure S2 shows the polarization dependence of the peaks  $E_{2g}^1$ , CEF1, CEF2 and CEF3  $T = 3.3$  K,  $E_{2g}^1$ ,  $E_{2g}^2$  and  $A_{1g}$  at  $T = 293$  K.

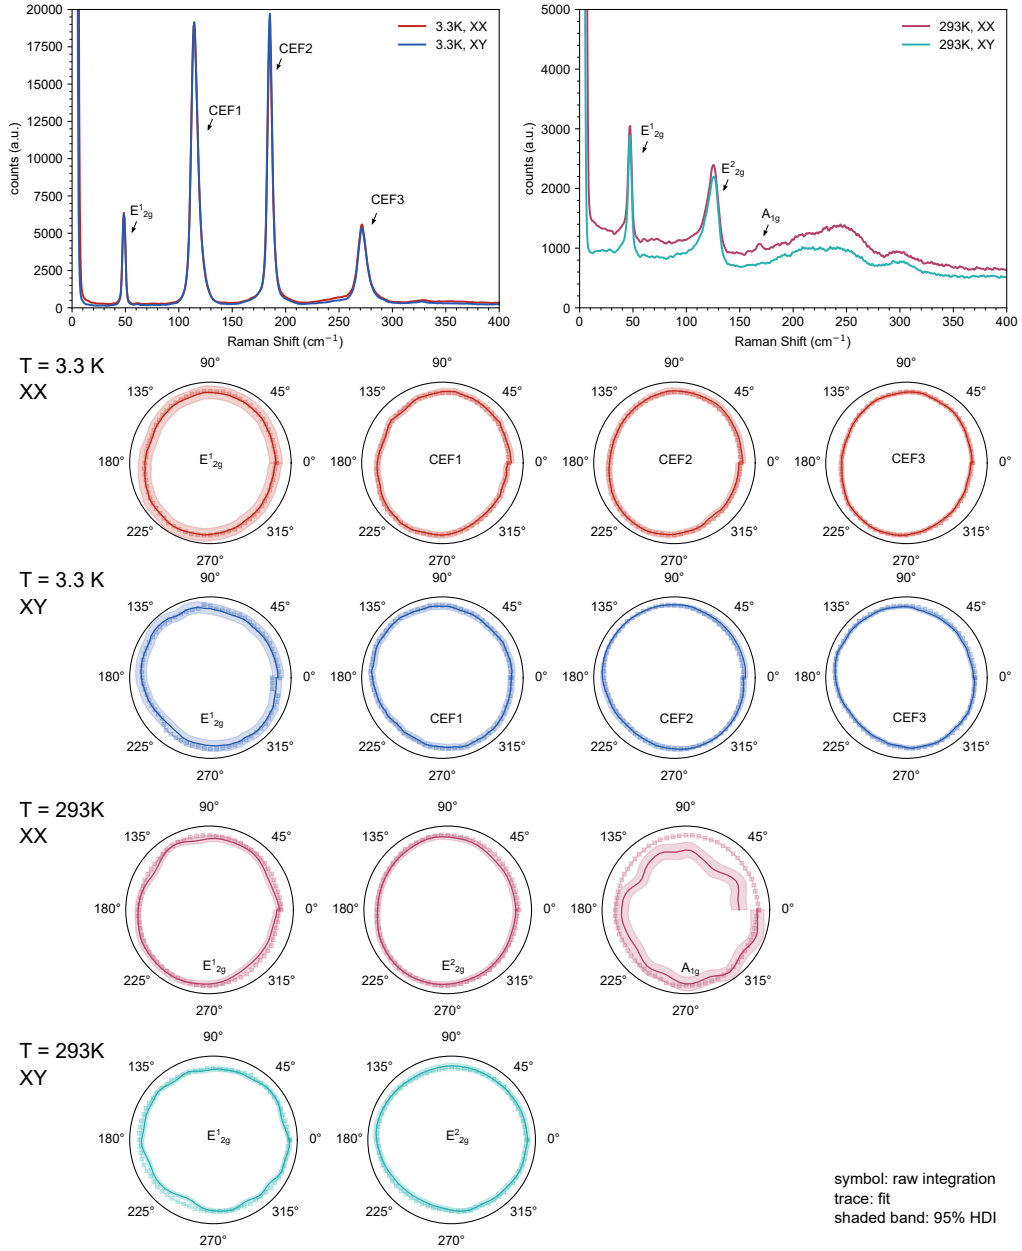

**Fig. S2.** Polarization and angular dependence of the at  $T = 3.3$  K and  $T = 293$  K.

#### 4. CALCULATED PHONON DISPERSION

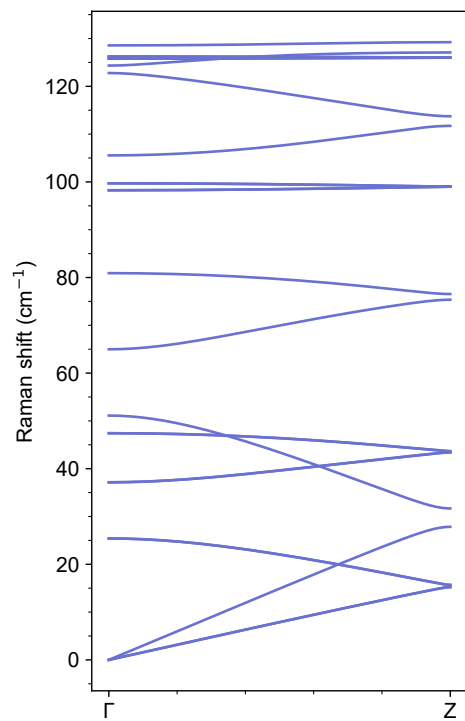

**Fig. S3.** Calculated phonon dispersion

## 5. POSITION DEPENDENCE

As described in the main text, we report subtle spatial anti-correlations between phonon and CEF modes, such as the CEF1,  $E_{2g}^2$ , and  $\omega_2$  modes. Simple spatial plots of integrated counts over a specific peak may be affected by baseline corrections and/or large peaks nearby. The baseline can be removed by asymmetric least squares fitting but the accuracy is not necessarily satisfactory. Meanwhile, full-blown curve fitting over thousands of spatial points can be computational expensive. Non-negative matrix factorization (NMF) is a simple algorithm that captures the most linearly independent basis vectors out of a given hyper-dimensional data cube with very low computational cost, yet it is effective in exploratory data analysis. Here Figures S4, S5, and S6 illustrate spatially resolved Raman spectra at  $T = 3$  K,  $T = 120$  K, and  $T = 130$  K, respectively. In these figures, (a) illustrates a subset of raw Raman spectra, with the inset illustrating the captured NMF components. (b-e) are integrated counts for selected peaks. (f-h) are the weights with respect to the basis vector components for the NMF decomposition. A similar anticorrelation between modes to that described in the main text is observed again in these representations. The  $(x, y)$  are the raw coordinate values. A value of  $(x, y) = (2127 \mu\text{m}, 104 \mu\text{m})$  was subtracted in the main text.

### A. $T = 3$ K

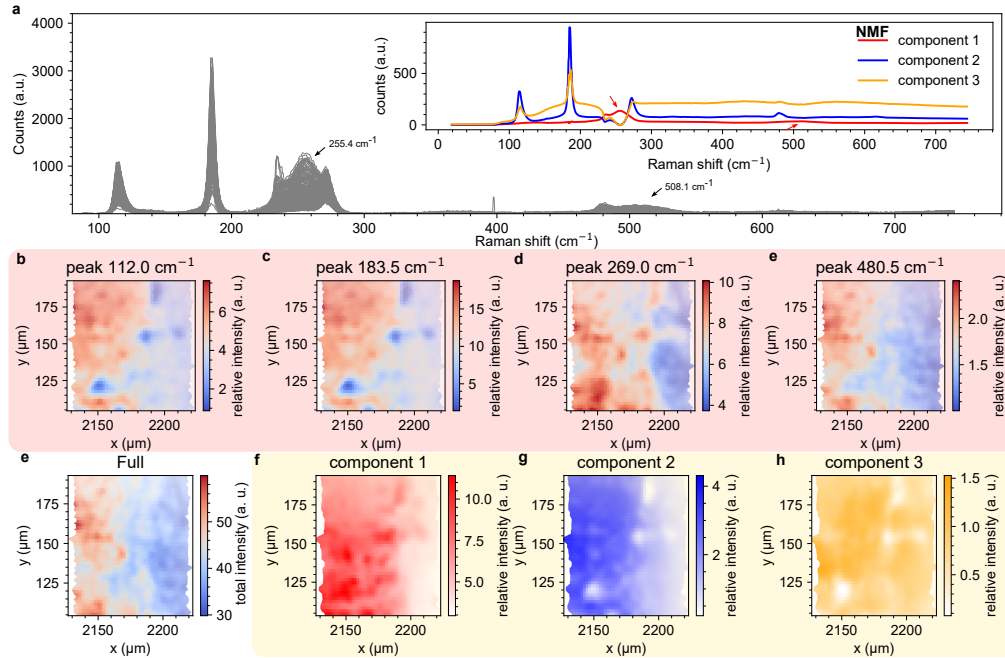

**Fig. S4.** Position Dependence at  $T = 3.3$  K.

**B.  $T = 120\text{K}$**

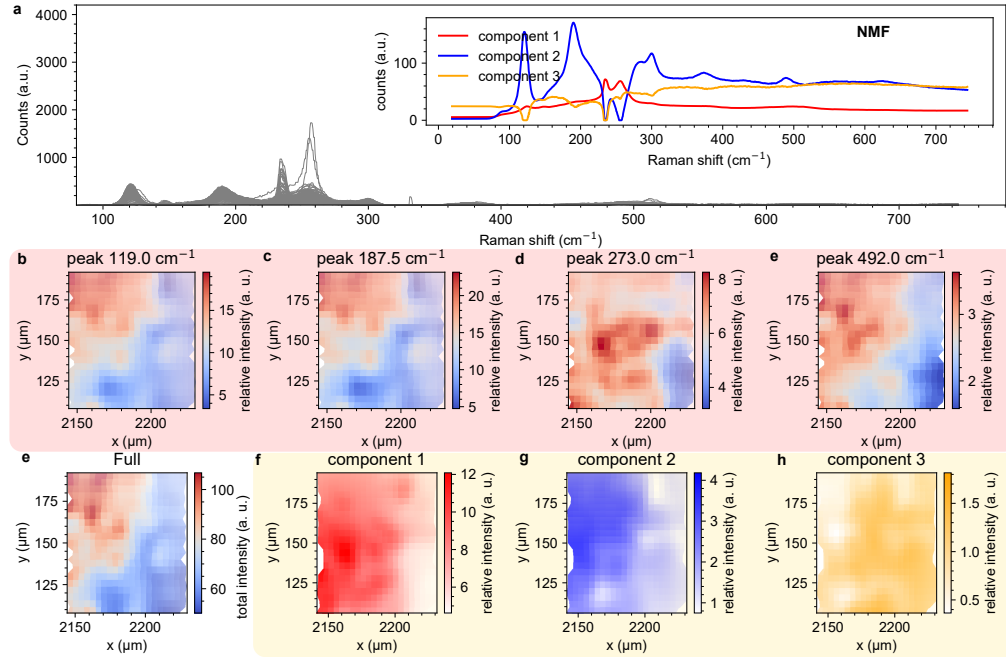

**Fig. S5.** Position Dependence at  $T = 120\text{ K}$ .

### C. $T = 130\text{K}$

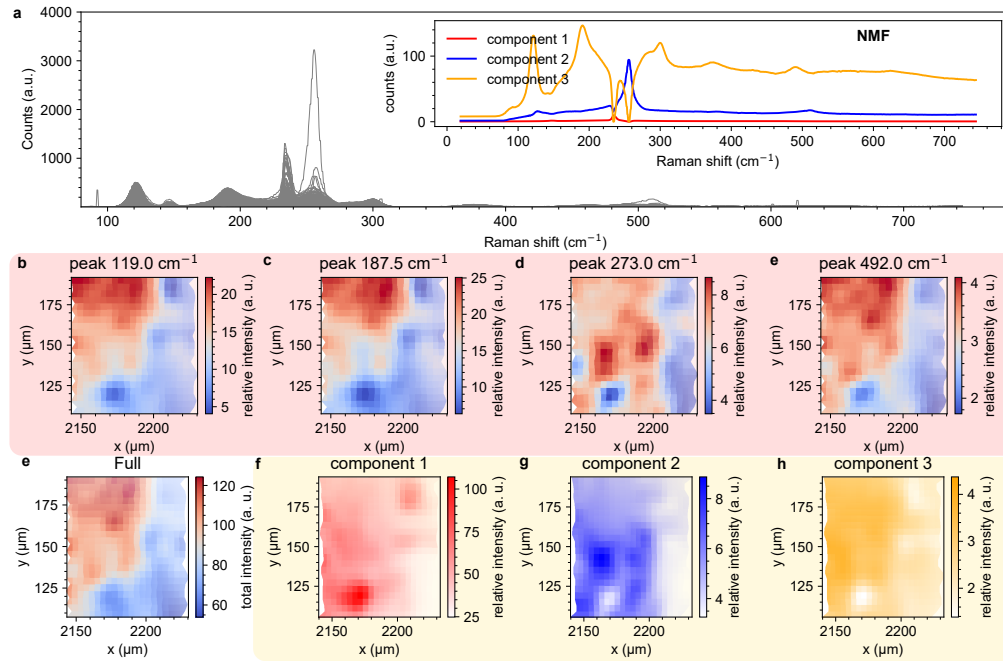

**Fig. S6.** Position Dependence at  $T = 130\text{ K}$ .
